# Supplementary material for: Harnessing Metabolites as Serum Biomarkers for Liver Graft Pathology Prediction Using Machine Learning
Source: Preprints.org preprint supplement (doi:10.20944/preprints202403.1827.v1), 2024-03-29
Supplement: Supplementary file 1 [file supplementary]

## Sheet: Sheet1
Samples	S1	S2	S3	S4	S5	S6	S7	S8	S9	S10	S11	S12	S13	S14	S15	S16	S17	S18	S19	S20	S21	S22	S23	S24	S25	S26	S27	S28	S29	S30	S31	S32	S33	S34	S35	S36	S37	S38	S39	S40	S41	S42	S43	S44	S45	S46	S47	S48	S49
CLASS	MASH	MASH	MASH	MASH	MASH	MASH	MASH	MASH	MASH	MASH	TCMR	TCMR	TCMR	TCMR	TCMR	TCMR	TCMR	TCMR	TCMR	TCMR	TCMR	TCMR	TCMR	TCMR	TCMR	TCMR	TCMR	TCMR	Biliary	Biliary	Biliary	Biliary	Biliary	Biliary	Biliary	Biliary	Biliary	Biliary	Biliary	Biliary	Biliary	Biliary	Biliary	Biliary	Biliary	Biliary	Biliary	Biliary	Biliary
Creatinine	144	108	102	106	85.7	90.1	149	65.2	192	134	61.7	112	128	73.9	72.8	91.6	109	83.4	71.5	73.3	74.6	114	168	93.9	109	73.5	88.7	50.3	89.2	141	120	138	129	62.2	90.7	286	62.6	73.7	164	139	85.3	118	44.9	66	58.4	95.1	53	109	126
Glycine	191	392	285	220	313	489	353	228	274	366	473	262	386	230	246	330	341	232	568	278	227	249	272	219	643	316	275	260	345	189	350	239	330	289	380	216	266	277	381	228	225	348	210	314	324	316	207	333	307
Alanine	283	484	631	432	446	660	576	448	371	354	627	246	431	415	212	571	357	532	589	282	282	352	925	403	453	479	232	339	312	319	488	372	465	222	407	227	363	656	416	374	139	276	213	289	481	341	191	419	506
Serine	73.2	89.4	85.9	93.7	149	151	129	95	112	89.4	207	144	107	131	120	206	123	120	130	168	98.5	107	160	94.7	108	131	128	103	123	77.8	120	85	83.4	103	181	77	125	124	218	125	109	99.9	109	140	85	107	119	95.1	162
Proline	259	410	260	181	199	252	258	191	232	313	375	170	215	158	155	164	207	248	225	179	175	145	412	171	215	265	143	183	191	216	147	237	319	239	207	176	238	224	237	182	97.5	283	101	187	293	243	89.7	156	195
Valine	296	281	180	232	155	299	262	302	224	203	267	214	159	242	156	267	224	237	148	205	152	150	404	175	127	172	131	171	123	203	177	176	140	206	283	100	296	217	261	164	134	177	156	293	235	247	131	163	285
Threonine	113	144	159	122	168	131	134	121	85.8	98.2	221	147	91.7	106	131	208	136	129	184	155	86.1	120	205	91.8	81.7	121	103	104	119	107	145	99.5	125	110	211	90.1	125	119	211	128	66.9	115	74.3	122	122	161	160	76	176
Taurine	51.2	68	101	91.9	72.1	212	86.7	92.5	73.8	110	240	122	56.1	72.4	64.8	56.6	114	95.7	104	67.3	80.7	91.1	85.5	55	66.5	80.7	73.5	92.5	91.2	170	42.5	104	28.7	50.5	65.4	115	95.2	40.6	98.3	95.4	65.2	59.4	44.4	84.5	119	69.2	20.7	75.9	106
Putrescine	0.19	0.126	0.238	0.161	0.5	0.625	0.102	0.14	0.212	0.392	0.271	0.173	0.16	0.143	0.226	0.491	0.48	0.245	0.51	0.123	0.201	0.539	0.528	0.37	0.478	0.366	0.338	0.168	0.349	0.559	0.298	0.202	0.819	0.396	0.466	0.395	0.779	0.368	0.34	0.202	0.223	0.309	0.245	0.193	0.293	0.189	0.361	0.193	0.305
trans-Hydroxyproline	10.4	43	12.3	9.82	11.6	21.9	13.6	11.4	8.16	11.1	7.83	8.68	20.6	16.6	13.8	8.49	15.3	14.7	24.2	8.93	11.2	14.5	8.74	6.77	17.8	11.1	16	6.52	18.2	21.4	13.2	14.8	21.4	12.7	6.95	14.2	9.16	15.5	16.2	29.5	7.89	13.9	10.2	9.04	7.39	13.1	8.23	21.2	19.9
Leucine	134	179	133	151	126	139	203	158	113	109	169	201	77.3	110	101	185	172	163	108	151	91.8	108	405	132	85.4	121	103	86.7	84.5	120	122	112	83.6	134	274	51.1	321	139	131	99.2	65.8	95.8	84.2	118	145	153	62.1	76.5	170
Isoleucine	101	97.5	62	77.9	57.2	79	100	74.4	79.4	50.2	86.6	91.1	47.7	56.2	61	84.8	80	83.1	60.8	73.5	42.7	61	129	67	43.7	69.6	51	50.3	37.5	68	46.5	66.4	49.2	60.8	111	28.3	150	75.3	64	73.1	34.3	45	43.5	55.1	68.8	82.9	38	47.7	111
Asparagine	43.2	49.3	34.4	34.9	58.9	40.5	50	43.9	38.6	44.7	124	43.7	52.6	29.8	36.6	80.2	43.1	45.6	52.3	39.7	26.8	45.6	73.4	37.2	44.3	38.3	34.8	57.2	37.2	40.1	40.6	32.9	64.5	34.4	72.9	39	54.6	43.9	75.1	50.6	35.4	49.9	47	57.8	48.5	47.9	50.7	43.8	59.6
Aspartic_acid	27.9	25	29.4	32.6	33.3	60	44.2	22.6	39.8	61.2	62.7	31.1	31.3	23.3	51.3	62.2	21.4	29	44.9	17.1	32.2	12.4	58.5	36.7	49.8	35.3	49.7	17	50.6	25.7	25.4	44.8	27.3	11.7	68.1	20.5	15.1	15.3	47.5	26.9	18.7	25.6	34.2	44.6	50.9	18.3	22.4	19.2	27.2
Glutamine	537	529	512	513	421	715	722	616	541	559	874	460	748	436	432	574	489	380	598	640	385	479	950	494	772	422	533	534	543	531	691	531	711	607	662	498	558	340	694	487	505	474	604	371	519	610	460	472	570
Glutamic_acid	109	164	94.2	101	121	186	93.3	77.2	181	146	207	50.3	110	64.4	92.8	347	60.8	116	83.1	62	64.4	40.3	136	94	135	188	129	62.2	116	77.6	150	201	116	128	217	103	121	80.6	188	73.1	61.2	142	80.5	172	241	123	37.1	149	107
Methionine	22.4	25.1	24	25.7	51.8	16	23.1	24.6	18.6	21.1	79.6	31.8	15.9	19	16.5	51.8	28.2	31.9	26.8	29.3	14.1	26	71.6	24.6	11.3	24.8	21.6	25	15.4	21.4	22.3	18	27.7	19.7	39.6	20.3	32.7	26.9	38.1	22	11.8	21.5	16.9	27.7	24.6	24.5	23.8	15.6	41.4
Histidine	67.6	69.3	77.3	80.6	99.9	80.4	102	73.6	57.6	95.1	120	72.8	77.4	57.2	66.2	83.4	70.4	61.7	110	78.9	52	63.7	138	62.6	40.8	64.6	78.1	51.7	61	58.4	80.5	73.4	81.1	57.2	97.9	56.1	79.7	61.7	95	51.9	37.4	73.1	57.7	79.1	69.8	70.5	57.8	44.8	70.7
alpha-Aminoadipic_acid	2.03	2.02	0.621	0.891	0.673	0.379	0.633	1.1	0.794	0.666	0.665	0.519	0.475	0.859	0.422	0.66	0.496	0.689	0.365	0.583	0.338	0.439	1.67	0.897	0.298	0.376	0.402	0.401	0.43	1.37	0.491	0.477	0.259	0.548	0.56	0.213	1.09	0.61	0.857	0.635	0.543	0.565	0.088	1.43	1.86	1.06	0.573	0.71	1.03
Phenylalanine	63.1	68.6	72.8	73.2	97.3	86.7	79.9	66.6	92.4	86.8	142	77	61.3	67.8	92.2	131	74.1	78.2	86.8	73.4	83.6	71	144	96.4	77.8	78	90.4	55.5	77.2	83.9	75.3	75.2	81.7	69.7	113	74.2	120	65.6	98	64.2	46.1	82.9	57.3	82.6	75.4	73.5	54.8	63.1	77.1
Methionine-sulfoxide	0.953	1.36	0.847	0.91	0.945	0.576	1.29	0.743	0.999	1.07	2.26	0.756	0.908	0.537	0.723	1.69	0.997	0.876	1.1	1.1	1.57	0.749	1.18	0.617	0.919	0.912	1.75	0.884	1.03	1.7	1.02	0.957	2.03	0.698	1.04	1.75	1.27	1.05	2.07	0.835	0.759	1.02	1.3	1.11	1.06	0.715	1.67	0.779	1.03
Arginine	111	112	79.3	93	110	105	116	115	81.4	115	194	104	92.2	96.8	94.4	112	102	103	125	94.1	106	114	165	114	43.3	84.7	99	118	132	77.1	112	84.5	102	85	165	99.2	103	86	96.3	62.1	64.7	115	106	85.7	120	102	91.7	80.7	120
Acetyl-ornithine	2	1.26	0.611	0.227	0.273	1.22	0.849	0.167	0.388	1.35	0.23	0.408	1.47	0.334	0.482	0.263	0.617	0.244	1.1	0.538	1.95	2.45	1.59	2.8	1.09	0.363	6.39	1.59	0.327	0.63	1.19	1.64	0.461	0.615	0.161	0.603	0.306	2.23	0.861	0.839	0.398	0.624	0.98	5.1	0.273	0.568	1.79	1.23	0.831
Citrulline	43.8	43.9	42.1	35.1	23.9	28.1	67.4	19.4	34.5	46.6	26.7	31.4	45.8	44	39.6	57.3	41.9	33	66.2	54.7	29.9	32.5	55	34.3	41.1	40.9	58.8	27.8	38.4	27.3	37	73.1	129	48	37.6	26.3	50.3	23.7	66.6	33.8	13.2	68.6	20.3	21	46.8	35.8	20	25.1	38.5
Serotonin	0.735	1.04	0.0575	0.494	0.0562	2	1.1	0.483	0.158	0.692	0.95	1.25	0.474	1.19	0.735	1.22	0.752	0.332	0.726	0.759	0.702	0.263	1.89	1.06	0.0752	1.19	0.132	1.65	0.58	0.467	0.875	0.1	0.382	0.261	0.332	0.63	0.494	0.161	0.375	0.0976	0.545	0.582	0.0759	0.761	1.73	0.0431	0.157	0.0489	0.216
Tyrosine	67.7	58.3	70.8	98	132	39	85.6	69.8	67.4	72.5	210	77.3	30.4	57.7	73	115	64	82.2	71.5	85.3	56.7	55.6	145	71.1	25.8	65.2	97.1	69.3	54.7	55	58.5	66.9	85.9	53.9	74.7	103	85	68.2	65.6	63.1	45	58.8	74.8	72.8	64.2	66.3	94	59.7	76.4
Asymmetric_dimethylarginine	0.478	0.649	0.566	0.631	0.488	0.775	0.573	0.387	0.621	0.493	0.688	0.399	0.668	0.465	0.641	0.747	0.501	0.622	0.728	0.631	0.522	0.454	0.893	0.415	0.927	0.592	0.619	0.51	0.514	0.923	0.832	0.572	0.869	0.974	0.711	0.748	0.677	0.528	0.842	0.46	0.44	0.663	0.613	0.47	0.572	0.601	0.503	0.53	0.55
Total_dimethylarginine	1.41	2.04	1.61	1.44	1.45	1.96	1.5	1.15	2.03	1.46	1.57	1.8	2.23	0.989	1.4	2.07	1.88	1.36	1.84	1.3	1.68	1.97	4.41	1.18	2.75	1.38	2.29	1.27	1.28	3.82	2.12	2.05	3.34	3.05	1.86	4.05	2.23	1.37	3.91	1.46	1.73	1.96	1.18	1.74	1.09	1.56	1.46	1.94	1.63
Tryptophan	57.5	66.8	52.2	86.1	37	54.1	59.2	69.6	48.8	60.6	107	46.6	26.5	53.4	47.7	60.5	72.7	72.1	52.4	62	43.5	58.2	68.1	55.9	10.4	76.4	36.7	45.7	41.1	34.8	34.1	54	32.1	35.4	40.6	29.5	49.4	67	53.2	51.7	28.8	42.5	39.8	90.8	55	52.6	58.2	50.5	43.2
Kynurenine	4.11	4.78	4.89	5.25	3.87	4.94	4.13	4.29	9.19	5.77	3.8	5.21	3.7	2.5	8.09	3.02	2.74	2.86	4.15	2.9	4.82	2.8	8.02	4.46	3.58	2.37	6.74	2.27	2.28	8.34	2.71	6.06	7.16	4.81	1.33	5	3.91	3.5	2.58	2.3	3.15	5.02	3.28	3.42	4.78	5.31	4.75	3.93	2.31
Ornithine	90.6	83	109	81.2	99.8	70.2	139	73.7	110	91.6	106	49.2	84.9	89.8	105	95.3	105	91.8	96.5	127	73.2	64.7	112	67.8	57.9	122	109	63.2	78.5	60.2	98	136	136	52	125	62.8	89.9	72.8	118	121	39.9	141	79.3	93.5	104	78.4	86.1	73.7	110
Lysine	187	213	192	182	217	196	161	256	140	190	298	149	120	209	113	284	199	227	220	207	123	183	313	201	99.7	177	146	205	160	186	140	154	228	190	272	165	185	210	205	146	96.6	139	140	208	232	230	120	157	236
Spermidine	0.109	0.0924	0.125	0.0761	0.352	0.18	0.0565	0.111	0.104	0.173	0.112	0.114	0.0557	0.0985	0.151	0.121	0.1	0.123	0.136	0.0657	0.0395	0.183	0.127	0.104	0.0503	0.146	0.0963	0.114	0.0572	0.0782	0.0976	0.0343	0.0695	0.0773	0.0411	0.0628	0.157	0.192	0.0526	0.0754	0.127	0.124	0.227	0.121	0.103	0.151	0.139	0.174	0.133
Spermine	0.14	0.125	0.144	0.118	0.2	0.158	0.129	0.145	0.142	0.132	0.173	0.144	0.122	0.15	0.143	0.138	0.123	0.138	0.148	0.122	0.133	0.18	0.257	0.158	0.145	0.195	0.185	0.128	0.135	0.183	0.126	0.151	0.13	0.131	0.12	0.151	0.135	0.128	0.123	0.126	0.126	0.144	0.127	0.145	0.166	0.175	0.118	0.146	0.119
Sarcosine	1	2.6	1.66	1.29	1.93	4.59	2.12	0.616	1.2	0.692	1.98	0.552	1.22	2.8	2.02	3.35	1.7	2.35	0.998	1.66	1.28	2.65	3.21	2.21	1.09	2.2	1.18	1.65	0.819	1.88	0.683	1.76	1.42	1.31	1.45	1.38	3.17	1.99	3.11	1.3	0.261	1.14	1.06	1.14	0.921	1.35	1.52	1.22	5.47
Diacetylspermine	0.0765	0.0384	0.0764	0.0889	0.131	0.0456	0.148	0.105	0.07	0.0766	0.095	0.0227	0.09	0.0397	0.145	0.0607	0.0729	0.079	0.0299	0.1	0.0719	0.113	0.138	0.0764	0.14	0.112	0.0529	0.0725	0.0272	0.0316	0.0967	0.114	0.0481	0.0391	0.111	0.0239	< LOD	0.03	0.0707	0.0401	0.107	0.0758	0.126	0.095	0.091	0.179	0.085	0.0479	0.127
Creatine	24.4	35.4	26.5	26.4	33.6	14.4	7.97	24.6	11.7	29.7	56.5	15.4	9.69	65.5	22.9	22.4	35	35.1	43.1	39.3	18.3	40.1	27.4	7.76	16.7	16.9	24.4	35.5	35.9	119	46.3	9.45	15.1	52	148	168	87.5	13.9	32.2	22.2	9.29	27	12.5	58.6	47.8	48	8.53	15.4	23.3
Betaine	61.7	85.7	52.2	41.3	90.6	42.1	38.2	31.3	29.6	40.6	39.9	41	31.5	42.8	28.1	25.1	20.8	43.8	26.3	50.5	30.3	22.7	60.4	39.7	13.3	38.2	58.4	24.1	10.2	32.9	8.33	34.2	40	29.5	25.7	5.54	66	38.7	12	36.4	7.46	40.6	33.5	32.8	37.7	57.4	40.9	12.5	34
Choline	11.4	6.67	11.1	9.19	13.2	10	10.6	6.77	6.38	12.6	8.43	9.97	10.9	7.57	10.6	11	10.5	21.1	6.94	6.27	13	6.96	13.8	8.41	6.7	8.05	11.1	5.05	5.05	13.4	4.06	12.3	23.4	10.9	8.81	8.17	14.7	8.39	9.74	10.5	3.09	12.3	7.74	11.3	7.65	14.4	9.12	7.25	11.8
Trimethylamine_N-oxide	4.05	57.1	9.56	14.9	< LOD	42.2	5.84	9.28	129	42.3	2.49	0.87	15.1	1.95	1.62	21.9	10.5	1.3	11.1	6.74	5.79	11.7	0.349	4.21	25.3	2.6	24	2.44	38.9	< LOD	29.4	42.9	2.51	2.13	36.6	111	0.763	28.4	87.4	19.6	23.2	19.5	4.64	15.2	18.1	9.15	1.5	3.04	17.7
Methylhistidine	249	181	8.89	9.76	6.66	125	8.37	9.57	16	39.9	3.7	6.45	19.9	26	12.8	9.21	27	23	6.46	7.75	7.79	53.4	30.3	4.06	12.2	34	35.3	4.04	8.22	13	10.2	39.8	13.4	6.69	34.4	20.4	7.49	12.8	25	40.9	20.1	28.6	2.24	12.4	15.8	10.6	9.4	71.3	17.4
Homocysteine	7.92	7.58	6.91	6.13	7.02	5.77	7.7	7.39	5.42	4.97	6.56	7.54	6.22	7.51	6.13	5.46	5.88	5.79	5.06	4.47	7.54	6.87	4.93	5.52	6.05	5.83	5.55	7.37	7.33	6.36	5.56	5.77	7.26	5.83	5.87	7.12	6.37	4.94	7.98	6.98	7.55	7.18	7.43	8.04	5.79	5.8	7.97	9.13	8.94
Lactic_acid	1390	2400	2460	1830	2060	2300	1320	1720	1880	1570	2790	1320	2270	2770	1150	1970	2050	3260	2130	1240	1520	1660	3150	1470	1980	2120	1820	1340	2520	2100	1310	2130	1450	1140	1490	1740	1710	2160	1560	2560	1350	1210	1450	1650	1870	1640	870	2200	2210
beta-Hydroxybutyric_acid	27	85.8	27.7	40.3	55.8	27	20.8	43.9	36.5	22.8	17.8	907	30.5	26.2	34.4	33.6	26.2	17.6	17	91.1	9.09	19.1	53.1	22.5	36.3	22.2	276	52.4	75.3	45.3	54.6	20	44.1	193	837	36.3	745	62.4	50	90.6	72.4	59.6	111	60	19.3	27.6	30.1	16.8	65.9
alpha-Ketoglutaric_acid	17.5	19.5	6.72	6.28	5.7	9.33	3.41	9.58	15.4	10.8	19	6.56	9.17	41.1	9.31	33.3	10.3	11.5	8.01	7.57	10.5	8.33	17.4	19.9	16.3	7.08	9.14	7.79	8.3	8.56	14.3	28.4	14.5	7.76	9.78	8.72	15.1	8.31	5.01	14.2	7.35	7.13	8.31	17.5	13.3	5.89	8.78	9.58	8.6
Citric_acid	47.7	133	99.2	101	104	75.3	98.3	85.4	154	101	144	88.6	109	66.9	41.5	53.6	58.7	46.8	111	90.9	34.7	62.8	43.1	59.5	61.9	66.4	123	73.4	60.8	46.1	75	139	66	46.3	87.3	62.7	89	80.7	47.1	117	33.7	65.9	77.3	87.4	63.5	73.3	85.2	54.8	50.7
Butyric_acid	0.677	0.606	0.296	0.321	0.279	0.899	0.636	0.701	0.679	0.708	1.09	0.519	0.742	0.519	0.539	0.568	0.551	1.03	0.224	0.615	0.308	0.366	0.431	0.824	0.472	1.17	0.904	0.398	0.105	0.0741	0.466	0.408	0.512	0.538	0.629	1.44	0.363	0.0922	1.22	0.532	0.52	0.51	0.295	0.437	0.43	0.299	0.842	0.524	0.588
Propionic_acid	1.82	1.56	0.577	0.995	0.731	1.57	0.862	0.962	1.08	0.222	1.18	4	0.868	1.52	0.98	1.04	1.11	0.783	< LOD	1.48	1.21	0.943	1.19	0.552	0.678	1.91	1.42	0.723	0.728	0.363	1.58	0.943	0.858	0.451	1.06	1.41	1.16	0.412	1.59	1.01	0.804	1.06	1.06	1.82	1.02	1.26	1.16	2.06	1.62
HPHPA	0.0852	0.0124	0.0859	0.118	0.0107	0.175	0.0971	0.0601	0.616	0.0119	0.0359	0.0155	0.888	0.0212	0.0111	0.151	0.388	0.131	0.363	0.039	0.0106	0.0115	0.507	0.11	0.244	0.0873	0.0409	0.101	0.146	0.0101	0.231	0.55	0.0131	0.0119	0.0108	0.142	0.0103	0.203	0.0764	0.287	0.0114	0.251	0.0245	0.595	0.164	0.461	0.0105	0.0136	0.0755
p-Hydroxyhippuric_acid	0.122	0.113	0.0878	0.0734	0.0336	0.129	0.367	0.127	0.518	0.133	0.124	0.0441	0.597	0.0345	0.0691	0.161	0.129	0.0855	0.188	0.0529	0.112	0.269	0.202	0.0546	0.581	0.0516	0.096	0.183	0.189	2.37	0.141	0.189	3.6	0.298	0.0823	4.63	0.169	0.33	0.126	0.148	0.0805	0.342	0.209	0.418	0.111	0.101	0.116	0.152	0.0999
Succinic_acid	1.02	1.84	2.69	1.36	1.89	2.1	1.74	1.75	1.53	2.04	1.84	1.01	1.49	1.45	0.999	1.22	1.46	1.2	1.97	1.61	1.04	1.23	1.84	1.38	1.12	1.91	2.07	1.55	2.28	1.22	0.851	2.49	1.7	1.17	1.77	1.41	1.37	1.39	0.716	1.86	0.879	0.977	1.19	2.55	1.47	1.63	0.815	1	1.59
Fumaric_acid	1.47	1.25	1.52	0.95	2.17	1.27	0.936	1.14	1.21	0.899	1.54	1.09	1.1	0.776	0.519	0.98	1.28	1.33	1.31	1.23	0.628	0.854	1.09	0.881	0.841	1.05	1.76	0.947	1.71	0.694	0.916	1.56	1.31	1.3	1.45	1.3	2.71	1.54	0.865	2.58	1.1	0.54	1.17	1.61	0.904	1.1	0.767	0.839	1.68
Pyruvic_acid	35.9	75	68.8	49.6	28.2	74.5	24.6	50	43.3	31	70.6	23.8	43	71.1	14.2	53.1	40.3	68.1	40	19.6	38.5	46.7	92	57.1	42.5	36.9	25.9	37	44.8	51.5	44.9	47.1	28.3	8.46	12.2	61.1	35.4	45.1	37.4	48.1	46.2	20.7	31.8	28.3	41.5	13.2	29.3	69.2	40.2
Isobutyric_acid	11.8	9.06	7.55	14.9	3.39	2.81	6.79	5.99	9.93	10.1	12.5	9.14	15.3	5.8	12.7	4.97	8.75	11	7.96	4.64	3.88	7.08	3.12	4.61	3.35	3.46	2.84	4.11	12.6	9.62	5.08	18.3	6.34	4.89	9.04	5.04	6.24	3.94	4.17	3.4	4.29	4.75	9.3	12.5	12.5	11.1	12.8	10.9	13.3
Hippuric_acid	10	1.39	1.22	2.23	1.15	0.694	1.42	0.548	3.83	0.926	0.746	0.0975	13.7	0.96	0.125	2.43	2.59	2.52	3.56	3.26	0.478	0.221	1.78	13.8	8.05	9.79	1.35	0.905	3.34	19.6	3.84	4.41	19.8	0.894	0.521	21.8	1.33	2.95	13	1.52	0.521	2.21	0.916	15.1	4.54	7.96	0.172	0.666	4.79
Methylmalonic_acid	0.0779	0.116	0.0983	0.0616	0.0928	0.0831	0.0844	0.0911	0.115	0.131	0.0313	0.0493	0.145	0.0545	0.0948	0.0738	0.073	0.0449	0.0928	0.0492	0.0527	0.146	0.221	0.0621	0.134	0.0673	0.0865	0.0594	0.101	0.235	0.109	0.128	0.16	0.0999	0.0724	0.303	0.109	0.0762	0.0985	0.0696	0.0582	0.107	0.0739	0.0699	0.046	0.0513	0.0927	0.115	0.0602
Homovanillic_acid	0.0381	0.0711	0.0347	0.0544	0.122	0.0464	0.0557	0.0285	0.097	0.0221	0.0468	0.0942	0.115	0.0238	0.0283	0.0552	0.0535	0.0434	0.0467	0.0553	0.0388	0.0286	0.113	0.0388	0.0402	0.031	0.0741	0.0377	0.0373	0.0582	0.0613	0.0933	0.118	0.0209	0.0415	0.154	0.0326	0.0523	0.0345	0.0542	0.0249	0.0471	0.0245	0.076	0.045	0.0698	0.0771	0.0266	0.0283
Indole_acetic_acid	1.38	2.46	1.31	0.746	0.276	1.56	0.517	2.3	2.5	1.44	0.519	0.726	2.78	0.838	1	1.05	0.854	0.704	0.59	0.505	0.604	1.42	0.492	4.92	4.68	0.607	0.495	0.606	0.609	0.63	0.344	1.89	8.91	0.351	0.47	0.823	0.438	3.24	0.796	0.854	0.0953	0.702	0.428	2.48	1.85	0.745	1.44	1.35	0.401
Uric_acid	550	513	361	735	274	630	497	473	367	515	258	410	555	301	330	267	342	253	211	383	437	458	527	410	436	364	441	273	296	269	421	508	191	294	221	416	558	260	369	429	343	331	260	387	389	424	204	558	295
Glucose	8545	10205	10706	5334	8673	4874	4794	4445	7580	3912	8183	2775	7765	3330	4088	4299	10225	11751	6158	5268	4795	4105	23837	4464	3805	5563	12678	6228	5574	12775	13831	6933	6663	13429	16899	6958	24308	9026	11007	5830	4051	6108	8156	5035	8447	7309	6603	4191	19644
LysoPC_a_C14:0	2.4959	4.0968	2.6419	3.3954	0.7017	5.9145	3.5918	3.006	1.7985	3.9902	2.7027	1.1855	5.286	2.3214	2.1014	2.2859	8.6246	3.8078	2.71	1.9923	6.2053	2.1256	0.5329	3.8491	3.1585	2.4622	1.0066	3.4213	3.4806	1.0704	2.4279	4.3057	1.7364	1.0718	2.9769	1.2191	1.5756	1.4987	8.0946	2.3143	0.999	2.0015	1.8765	5.5356	2.6653	1.2359	1.2871	2.5964	1.8336
LysoPC_a_C16:1	1.1204	1.7533	1.8804	2.5522	1.0985	2.8001	1.6917	2.1184	1.2377	3.1005	1.8443	1.0262	5.5338	1.9349	2.1894	3.0618	3.4676	2.589	2.5956	1.7128	3.9205	2.211	0.6613	2.2554	4.0558	1.9783	1.5832	2.2453	4.3563	0.8803	2.5756	2.7471	1.3967	2.377	5.0348	2.4136	1.6197	1.195	5.7014	2.2988	1.9268	1.3288	1.8473	2.7372	2.2897	0.9807	0.7968	2.4464	1.9531
LysoPC_a_C16:0	33.7713	43.9067	46.3942	69.2764	27.4394	100.581	64.8676	48.0492	30.1155	63.7599	44.3462	26.8971	96.7915	65.7507	41.2673	44.1044	86.6595	90.0299	42.7914	52.492	93.7705	49.892	15.4563	44.669	69.7466	51.1784	25.3254	56.1364	71.3284	22.8993	33.0015	55.3612	32.2165	48.6838	74.4117	42.1691	32.8983	38.8384	124.227	51.5364	30.8324	38.5467	29.219	71.3791	50.1966	34.3447	13.4403	58.5885	62.5042
LysoPC_a_C17:0	0.5449	0.8773	0.8385	0.9444	0.3345	1.5161	0.8608	0.9357	0.4189	0.7089	0.5643	0.3914	2.0026	1.3571	0.7332	0.731	1.7534	1.7141	0.7031	1.0002	1.1539	1.0074	0.2746	0.9759	0.9859	0.6974	0.5006	1.3865	1.0535	0.4206	0.6205	0.9308	0.6155	0.8931	1.1596	0.9356	0.468	0.9219	2.0015	1.3271	0.3596	0.8425	0.3619	1.6807	0.8541	0.9647	0.2364	1.0344	0.947
LysoPC_a_C18:2	11.5012	11.8677	11.8575	16.0085	5.9024	27.9516	22.1483	10.3194	5.3943	6.8962	9.3654	6.7908	50.8938	22.3426	12.6622	11.428	26.2277	24.2913	12.4333	24.1175	27.6526	17.2742	2.3433	18.5674	21.7259	24.7115	4.8065	16.124	11.4885	8.2469	11.1614	13.0928	12.4847	22.5301	20.9027	16.9162	8.1091	19.9327	38.6003	23.1951	8.9915	8.7718	5.8747	38.6083	8.1656	6.6018	3.2295	20.6696	17.3666
LysoPC_a_C18:1	6.964	10.4941	9.165	11.3318	7.7534	19.8514	12.1348	9.7591	5.3205	8.4233	8.2886	5.1765	34.5471	15.5296	13.3546	10.4918	19.6684	15.754	12.4643	11.4055	16.6753	14.6792	3.0907	12.2397	23.8246	10.7156	7.1399	20.2161	13.8404	7.4708	12.1156	11.0819	12.7102	20.4504	18.6084	19.7148	9.1205	10.7133	32.7087	18.4861	9.7444	7.526	7.1148	26.6184	10.4692	8.2131	3.6819	20.5873	11.9374
LysoPC_a_C18:0	10.8566	11.5712	16.0983	18.2582	7.4009	28.2957	16.6565	12.6875	11.187	15.4626	10.2239	6.0912	23.7273	14.9808	7.9812	8.5788	16.949	19.0363	11.3893	12.7619	17.6524	10.7158	3.1877	7.4088	20.3027	11.2679	5.5635	16.298	15.3427	4.5473	6.1182	15.913	7.9359	9.3333	11.0591	8.5876	6.6571	8.6874	23.3933	13.3113	6.9556	8.9787	7.3669	22.3505	14.5755	10.2306	2.9756	16.2425	10.8797
LysoPC_a_C20:4	1.9935	5.6716	4.3539	2.6105	1.6953	5.7219	3.1984	3.7611	1.4847	2.4405	1.5277	1.8624	6.4951	4.4401	3.4913	1.4725	5.4664	4.6236	2.6099	2.161	4.0028	4.4305	1.1396	1.9966	6.716	2.8753	1.1843	4.0682	2.6214	1.8114	2.4152	2.2948	2.292	4.7128	4.0748	2.0252	2.1151	2.9419	7.7029	3.5791	2.5047	2.5529	1.638	3.0555	4.2316	2.9925	0.6333	3.5026	3.0221
LysoPC_a_C20:3	1.8558	2.354	1.8057	1.946	1.0248	2.5287	1.7476	2.6676	1.6126	1.5542	1.6522	1.0636	4.9667	1.342	2.0978	1.7259	2.8771	2.1375	2.0782	1.8333	3.4253	1.5529	0.9487	2.0418	2.2981	1.5993	0.9206	2.7463	1.7296	1.2721	1.2653	1.5588	1.354	2.2527	1.7407	1.7364	1.488	1.12	3.6033	1.5168	1.8987	1.5406	1.337	3.2111	1.6841	1.7558	1.4376	2.6063	1.8038
LysoPC_a_C24:0	0.1781	0.1315	0.1853	0.162	0.1771	0.2492	0.2422	0.1665	0.1801	0.1305	0.1568	0.1763	0.2342	0.1322	0.1505	0.2097	0.2076	0.1665	0.1931	0.1782	0.224	0.1601	0.194	0.1867	0.2035	0.1659	0.1845	0.1824	0.1779	0.1537	0.2016	0.1976	0.197	0.1249	0.1585	0.3359	0.2132	0.1548	0.1716	0.179	0.1371	0.1289	0.1458	0.2419	0.153	0.1591	0.2247	0.1633	0.1346
LysoPC_a_C26:1	0.0452	0.0885	0.0806	0.081	0.0377	0.0793	0.1198	0.0452	0.0491	0.0803	0.0742	0.0751	0.0623	0.0818	0.0638	0.1049	0.0966	0.088	0.0679	0.0607	0.0769	0.0554	0.1039	0.0922	0.0872	0.0371	0.0936	0.0674	0.052	0.0573	0.088	0.1024	0.1155	0.0749	0.0895	0.1622	0.091	0.0615	0.1172	0.0636	0.0476	0.0472	0.1098	0.0765	0.0529	0.0469	0.07	0.0569	0.049
LysoPC_a_C26:0	0.1475	0.1194	0.1865	0.1545	0.1508	0.1557	0.2045	0.0988	0.1556	0.1456	0.1792	0.1354	0.1665	0.1989	0.1326	0.2352	0.2011	0.2517	0.1335	0.1363	0.2942	0.142	0.1722	0.117	0.1771	0.0998	0.1153	0.1473	0.1546	0.1706	0.1548	0.2488	0.2799	0.1461	0.1908	0.367	0.2015	0.1288	0.2259	0.24	0.0784	0.1225	0.2161	0.1668	0.1113	0.1064	0.1182	0.1621	0.0906
LysoPC_a_C28:1	0.117	0.1945	0.2538	0.3191	0.1181	0.2746	0.1849	0.1764	0.131	0.2158	0.2101	0.1672	0.2031	0.2027	0.1428	0.4524	0.2885	0.2284	0.1668	0.1269	0.2888	0.1252	0.1913	0.2717	0.1586	0.1172	0.1736	0.1993	0.1655	0.1563	0.3095	0.2181	0.2459	0.1349	0.1644	0.444	0.2015	0.1418	0.2345	0.1375	0.1231	0.2221	0.3002	0.3364	0.1308	0.1007	0.2714	0.1573	0.1157
LysoPC_a_C28:0	0.1967	0.1288	0.2478	0.2671	0.2214	0.2775	0.2917	0.127	0.1856	0.2321	0.3025	0.1968	0.1855	0.2379	0.2117	0.5363	0.3643	0.2063	0.2693	0.2322	0.3603	0.1962	0.2008	0.2835	0.1678	0.1218	0.1791	0.1656	0.2586	0.194	0.4132	0.3235	0.3016	0.1486	0.2407	0.4654	0.2015	0.1856	0.3174	0.1816	0.1189	0.1621	0.2607	0.2419	0.1391	0.1339	0.4071	0.1621	0.1333
SM(OH)_C14:1	5.8686	6.1806	5.2387	6.7553	3.9201	9.1593	4.6092	6.566	3.6591	6.179	6.6634	3.874	6.6352	7.4379	4.0305	16.1769	5.3522	7.9007	4.6867	4.4114	5.243	5.0304	5.6281	7.7053	3.6438	4.7068	7.6083	8.092	6.5361	2.9314	9.7769	5.7062	4.6473	4.1769	8.1518	13.9664	5.7435	6.2735	7.2411	5.4793	4.6385	9.1013	9.1061	10.083	5.6864	4.5351	6.8929	5.6095	7.3947
SM_C16:1	15.969	17.4	16.5515	16.2859	27.2987	26.2083	19.3471	19.7603	15.9701	21.3858	25.3415	11.2382	20.3483	24.1686	13.6357	45.9767	15.6321	20.2829	11.2068	13.0063	18.2334	14.586	18.6932	16.1017	14.158	18.1216	22.0822	21.8876	23.7246	10.5006	30.1419	18.976	16.1314	15.7619	30.5047	52.2889	15.971	16.284	21.0553	15.5863	15.1714	21.0683	40.4479	20.091	12.1909	13.2634	23.0204	16.6988	19.1472
SM_C16:0	108.826	121.762	109.361	122	189.245	215.316	124.115	110.965	116.128	147.924	202.324	105.597	163.365	158.35	105.948	303.758	109.728	144.585	122.008	96.4677	165.476	126.338	134.627	115.559	113.644	126.87	191.577	154.827	163.929	83.4975	269.797	117.582	180.165	119.356	205.136	336.178	144.654	113.797	151.011	122.516	121.481	142.267	268.517	140.154	99.359	99.7891	181.975	158.851	133.848
SM(OH)_C16:1	3.2368	4.0933	3.3031	3.7779	3.1133	5.1223	2.2464	3.8764	2.1042	3.9219	3.9628	2.638	4.1906	5.8226	2.804	8.572	3.1731	4.7041	3.5924	2.2763	3.1957	3.4479	4.5444	3.2888	2.1783	3.2204	4.374	5.0127	4.0258	1.832	6.5139	3.3119	2.9077	2.5276	5.7076	9.1743	3.889	3.8761	3.6761	3.6488	3.3323	4.4064	4.3653	4.5681	3.4703	3.2165	3.5119	3.4812	3.8424
SM_C18:1	8.3864	13.2773	11.458	10.2697	12.1516	19.6872	6.5355	12.6782	7.5966	16.4366	13.4899	7.7538	9.9113	19.8419	7.7182	24.4113	8.8436	12.0519	8.1151	5.443	9.0388	9.5797	14.3727	6.8567	9.239	12.7097	11.4209	12.2476	15.7859	6.4339	19.4684	10.2078	7.7327	11.3184	20.4527	26.5855	14.0212	10.4618	10.1422	8.8269	13.2046	10.9014	18.0849	9.0256	9.189	8.3924	8.7138	8.3339	10.3635
PC_aa_C32:2	2.5922	4.1188	2.9016	3.408	3.1621	8.0228	3.4543	3.0386	2.1522	4.9812	5.2706	1.9837	4.0843	4.6418	3.2504	22.034	5.025	4.3903	2.8818	2.4872	4.7995	2.7302	3.2487	4.3824	3.1042	4.5285	4.0546	3.7987	5.6766	2.7085	19.6807	5.3021	5.8231	2.6774	9.1772	20.5279	3.7309	2.86	8.6964	2.9914	2.4175	3.4184	11.2188	5.2087	2.8732	1.6192	6.1526	2.8515	2.9643
SM_C18:0	22.4749	35.3043	28.6508	30.1479	31.2337	54.6801	19.9378	30.4831	21.5794	43.295	35.9784	21.0214	29.3258	41.7651	19.0143	85.6132	22.0419	32.5138	26.8762	14.4307	27.4016	26.6519	40.0267	19.5638	21.4755	30.1917	26.9437	28.4658	43.7716	15.9996	63.9247	24.2192	19.7161	23.5932	55.6404	86.6308	44.2024	23.9333	30.7593	22.1426	35.5192	25.7333	52.2238	28.518	27.4099	22.5799	27.5457	25.0226	26.3488
SM_C20:2	0.6307	1.5152	0.7652	0.5996	0.5674	1.5352	0.6455	0.833	0.5203	1.2594	1.117	0.4729	0.9	0.8602	0.8817	2.9047	1.2325	0.7985	0.5962	0.4556	1.2285	0.7359	0.6196	0.7542	1.2929	0.7698	1.0361	1.0547	0.9506	0.67	3.7376	1.0286	1.3499	0.4975	1.6034	3.0063	0.6946	0.6066	1.6919	0.727	0.5149	0.9677	2.3328	1.342	1.0522	0.4396	1.0139	0.5152	0.6972
PC_ae_C36:0	1.0803	1.0299	0.8603	1.0985	1.8701	1.2241	1.0002	1.1147	0.8687	1.526	1.5363	0.9294	1.6097	1.5342	1.3298	4.395	1.3557	1.177	1.5244	0.7603	1.4282	1.0987	1.5421	1.2298	0.9913	1.0645	2.3254	1.6036	1.7411	0.9182	4.6095	1.6897	1.9227	1.2098	2.1272	6.2432	1.2397	0.9364	1.8267	1.2143	0.6586	1.5078	2.163	1.7635	1.4391	1.0115	2.0105	1.382	1.2011
PC_aa_C36:6	0.4382	1.1795	0.6234	0.6104	0.5239	1.7432	0.4417	0.673	0.3543	1.301	0.5879	0.283	0.7214	0.8494	0.7138	2.4537	0.8756	0.7445	0.4397	0.3392	1.1153	0.8381	0.4681	0.4645	0.9757	0.6153	0.6506	0.7462	0.6496	0.6509	2.1155	0.7009	0.8895	0.3922	1.2355	1.8534	0.5843	0.5182	1.687	0.5363	0.1794	0.6491	1.3543	0.8725	1.0517	0.3638	0.5611	0.3448	0.9054
PC_aa_C36:0	5.118	4.8367	4.4094	6.0038	8.8571	8.1698	4.7999	5.2469	4.7254	8.43	7.1363	3.2858	5.7398	6.3838	4.5198	20.2934	4.7743	5.5149	7.1874	3.8449	6.1564	4.6253	5.0893	3.9473	7.3327	4.9672	6.3117	7.4079	6.8873	3.7952	11.7338	6.9301	8.9529	4.0583	7.3253	28.1841	5.2608	3.4961	7.2053	5.552	3.2452	4.1937	11.7516	7.6253	7.9237	3.7349	9.2387	6.4014	5.0833
SM(OH)_C22:2	10.9816	11.9787	10.3998	11.0139	9.0976	13.3915	9.551	13.5592	9.0054	15.3581	15.0831	7.8649	12.2927	13.7814	9.8136	24.8236	9.1952	11.8167	10.1892	7.5351	12.5328	10.5561	10.6521	12.4247	9.0545	9.6217	14.6906	16.3125	12.2279	7.1618	18.5497	12.0841	10.6258	7.5755	17.1681	23.3242	9.6972	10.5129	11.9045	11.0194	7.9207	14.5159	17.8487	16.4838	12.6297	8.935	14.1845	9.1669	11.6132
SM(OH)_C22:1	16.2154	13.988	14.5523	15.3019	9.4188	16.9407	16.5638	15.693	11.4974	16.7604	16.6726	7.9532	12.8908	12.6029	9.1736	19.3285	9.839	12.0632	10.5352	8.7843	16.2823	10.204	11.6299	13.5059	6.968	13.0989	12.5437	16.5228	9.8108	7.2821	18.072	12.0742	9.2704	7.2966	16.4988	17.8756	9.4661	9.6984	9.7354	11.5962	4.9216	13.1014	12.6769	21.5354	14.6905	10.3966	9.0985	8.2166	9.3648
PC_aa_C38:6	30.1127	63.4622	44.7428	47.3216	74.4108	113.144	27.1967	34.4362	36.9028	115.501	66.745	34.5588	31.9376	75.5575	40.8266	236.418	29.7591	54.1993	21.4834	34.5752	45.1982	43.1353	50.2919	26.7877	52.3455	47.2901	49.1672	35.3865	49.1216	44.8908	97.0915	45.8453	39.117	25.7952	77.6239	98.4828	45.4338	57.035	74.1148	29.3797	14.2881	51.5423	110.738	27.3684	90.621	38.0756	50.4331	25.767	79.6809
PC_aa_C38:0	1.897	2.3302	2.148	2.2223	3.3442	4.3303	1.764	1.6379	2.3254	4.8561	4.1409	1.5488	2.1322	4.6314	2.1829	6.843	1.9404	2.9558	1.8309	2.5776	3.0441	3.3681	2.5397	1.5375	2.5995	2.8138	4.5162	2.7643	2.3867	2.109	3.8698	2.0662	3.6427	2.0024	3.1154	6.1987	2.5745	2.66	3.2945	2.7413	1.2475	2.4234	4.4514	1.8815	2.7628	3.2044	3.5293	2.7338	4.9872
PC_ae_C40:6	2.6226	3.0651	2.542	2.7884	3.8443	4.4687	1.8139	2.3645	2.3894	4.6737	4.834	2.6126	2.746	5.3935	3.4163	8.1912	2.5217	4.5428	2.7974	2.5864	4.2159	3.8041	3.3825	1.9569	3.3533	3.304	5.1136	3.5132	3.0636	2.2482	4.9768	2.6608	4.4586	2.7106	3.8693	7.0738	3.3729	3.6039	3.5863	3.134	1.2708	3.2007	4.3273	2.3767	3.5921	3.7134	3.2461	3.5696	4.5617
SM(OH)_C24:1	2.5204	2.5161	2.5185	2.595	2.3357	2.8577	2.3093	2.5515	2.0275	2.8441	2.4452	2.1654	2.5717	3.1991	1.9997	5.1537	2.075	2.4584	2.4909	1.5084	2.497	2.2859	2.6158	1.9647	1.8307	2.2803	3.71	2.4764	2.6873	1.5335	4.615	2.5826	2.4801	1.6682	4.1303	6.0421	2.3343	2.7607	2.6829	2.537	1.4281	3.0075	2.982	3.2499	2.722	2.1162	3.0096	2.0172	2.3923
PC_aa_C40:6	12.4034	19.9658	21.0572	18.1898	25.417	37.5376	8.4574	10.7204	18.6236	44.5666	20.1681	10.8357	7.4893	18.3271	9.3039	69.1353	8.3141	16.9492	10.2708	10.59	13.962	11.2408	14.7017	6.2309	22.0789	12.795	16.8166	12.0932	16.6605	10.5037	18.5304	16.5038	10.548	6.8996	14.0415	22.8368	13.0435	13.985	15.7907	7.9691	4.4594	11.51	34.7257	7.0898	35.2138	13.726	20.5073	8.1969	16.9253
PC_aa_C40:2	0.4047	0.351	0.372	0.47	0.6523	0.7001	0.736	0.3338	0.3629	0.5913	0.627	0.4685	0.7219	0.6334	0.4183	1.9104	0.4038	0.5694	0.4567	0.4058	0.5724	0.5593	0.4681	0.421	0.4621	0.506	0.8307	0.4813	0.6754	0.5117	1.672	0.503	1.0703	0.4984	0.8683	3.2796	0.6328	0.4407	0.7732	0.5443	0.3741	0.4776	1.3444	0.6344	0.4414	0.3165	0.7318	0.6023	0.5275
PC_aa_C40:1	0.2709	0.2526	0.2823	0.3013	0.4341	0.5313	0.3381	0.271	0.261	0.4793	0.5466	0.3011	0.4012	0.4602	0.3487	1.3699	0.2592	0.435	0.3144	0.2658	0.5334	0.4286	0.3228	0.2997	0.379	0.3547	0.5552	0.3448	0.3864	0.2868	1.0964	0.315	0.582	0.3473	0.5185	2.1242	0.4096	0.3142	0.4641	0.3392	0.1794	0.2831	0.875	0.3675	0.3531	0.2539	0.5348	0.3843	0.3742
C0	37.7049	37.1441	40.9346	45.4053	81.1207	9.496	25.4245	32.0689	11.5973	36.3092	39.2955	25.8721	29.3026	47.6805	23.9912	56.909	50.405	55.7372	34.095	27.0072	23.5283	51.297	174.024	47.6862	27.7011	47.5049	14.3186	39.3426	39.6165	45.3595	58.7153	28.3612	22.0821	19.3946	37.4682	131.306	70.0291	58.7178	46.8887	35.5323	29.0945	34.8387	18.8403	24.9805	32.3086	38.5477	14.6097	36.3864	42.7059
C2	8.915	10.9849	8.5322	10.6011	26.2181	3.0478	7.4128	8.1304	4.1038	9.7425	6.2028	11.4957	7.2454	5.7965	4.7248	8.0833	8.4177	6.7132	6.311	7.0586	4.2518	10.0817	25.8306	6.6993	8.9586	10.7547	8.1857	10.8569	11.4134	29.335	10.5149	6.5491	10.0632	10.6629	10.8297	63.7436	29.0935	14.0198	12.0294	12.7852	13.1416	9.5118	7.6024	8.3226	6.3081	8.3502	5.5955	9.4408	13.8424
C3:1	0.0221	0.0295	0.0224	0.0246	0.0272	0.0243	0.0245	0.0288	0.0275	0.0207	0.0225	0.0209	0.0226	0.0262	0.0231	0.0268	0.0291	0.0222	0.0417	0.0218	0.0186	0.0259	0.0278	0.0185	0.0161	0.0205	0.0194	0.0249	0.021	0.0233	0.0274	0.0301	0.0342	0.0172	0.03	0.0341	0.0185	0.022	0.0273	0.0159	0.0324	0.0235	0.0395	0.0307	0.0297	0.0241	0.0297	0.022	0.0235
C3	0.5891	0.3002	0.2725	0.3738	0.416	0.1365	0.2194	0.3011	0.1558	0.3878	0.2665	0.1978	0.2303	0.3635	0.2515	0.6845	0.5168	0.4855	0.2149	0.2809	0.178	0.5487	0.9611	0.6394	0.2337	0.4887	0.152	0.2612	0.2979	0.5592	0.3748	0.2833	0.2292	0.2	0.2352	1.4086	0.5251	0.5484	0.7062	0.3288	0.2027	0.3193	0.159	0.3315	0.2579	0.2918	0.1533	0.2218	0.749
C4:1	0.0369	0.0364	0.0268	0.045	0.0652	0.0538	0.034	0.0524	0.0483	0.0383	0.0572	0.024	0.0413	0.0349	0.0338	0.037	0.0469	0.0387	0.0381	0.042	0.0399	0.0403	0.0611	0.0287	0.031	0.0368	0.0514	0.0351	0.0476	0.0428	0.0425	0.0431	0.0598	0.0314	0.045	0.074	0.065	0.0485	0.0439	0.036	0.0412	0.0443	0.0428	0.039	0.047	0.0358	0.0286	0.0514	0.0605
C4	0.2984	0.3846	0.2016	0.2652	0.277	0.3094	0.1356	0.1897	0.3782	0.4054	0.1322	0.0995	0.2578	0.4244	0.2409	0.2987	0.3391	0.3407	0.1168	0.2511	0.2142	0.2886	0.7857	0.3539	0.231	0.3213	0.1203	0.2107	0.1947	0.8165	0.2895	0.2124	0.3328	0.2197	0.155	0.8217	0.4981	0.3154	0.6708	0.2383	0.2032	0.3571	0.0938	0.6177	0.2543	0.2176	0.0761	0.1683	0.2745
C3OH	0.0546	0.0458	0.0456	0.0355	0.0523	0.0484	0.0509	0.0569	0.0599	0.0444	0.0354	0.034	0.0399	0.0554	0.0435	0.0541	0.046	0.0432	0.0342	0.062	0.0487	0.046	0.0525	0.0416	0.0526	0.0547	0.0464	0.0715	0.0467	0.046	0.0478	0.0416	0.0451	0.0379	0.0419	0.0349	0.0454	0.0324	0.063	0.0578	0.076	0.0523	0.0557	0.0545	0.0444	0.0525	0.0366	0.0516	0.0556
C5:1	0.0402	0.0528	0.038	0.0278	0.0547	0.0353	0.0352	0.0321	0.0329	0.0351	0.0355	0.0362	0.0438	0.0435	0.0319	0.0476	0.0338	0.0394	0.0257	0.0355	0.0436	0.0371	0.0557	0.0339	0.04	0.0354	0.036	0.0261	0.0331	0.0544	0.0247	0.0387	0.0498	0.0355	0.0352	0.099	0.0278	0.0363	0.0553	0.0313	0.0363	0.0342	0.0354	0.0516	0.0466	0.0339	0.0257	0.0301	0.0535
C5	0.3743	0.287	0.1086	0.1618	0.1755	0.0789	0.1023	0.1289	0.1136	0.1399	0.1093	0.0883	0.1109	0.0975	0.0644	0.2124	0.1593	0.1794	0.0428	0.123	0.0711	0.1229	0.6674	0.1534	0.0764	0.1102	0.0648	0.0803	0.0836	0.2693	0.1424	0.148	0.1287	0.0792	0.1473	0.4433	0.2388	0.1137	0.2201	0.1399	0.0814	0.1692	0.0435	0.1748	0.1065	0.1329	0.1093	0.1017	0.2041
C4OH	0.077	0.0787	0.0496	0.0548	0.1012	0.0527	0.0508	0.0335	0.055	0.0414	0.038	0.0748	0.0376	0.042	0.0311	0.0565	0.0589	0.0496	0.0457	0.0699	0.037	0.0529	0.1594	0.1843	0.0471	0.0476	0.0952	0.049	0.0539	0.1276	0.0456	0.0451	0.0894	0.0495	0.1053	0.2198	0.1324	0.0895	0.0496	0.0709	0.0808	0.0405	0.0484	0.051	0.0539	0.0406	0.0557	0.0453	0.0535
C6:1	0.045	0.0544	0.0357	0.0391	0.0415	0.0308	0.0244	0.0283	0.0445	0.0296	0.0229	0.0295	0.0387	0.0308	0.0222	0.0365	0.0228	0.0335	0.0274	0.0375	0.026	0.0299	0.0492	0.0357	0.0526	0.0382	0.0421	0.0484	0.0317	0.0645	0.0276	0.0378	0.043	0.0318	0.029	0.0751	0.0518	0.0309	0.0309	0.0399	0.0491	0.0457	0.0271	0.0436	0.0517	0.0354	0.0315	0.0269	0.0326
C6	0.1203	0.1395	0.1075	0.1104	0.1925	0.0426	0.0931	0.093	0.061	0.1	0.0607	0.1085	0.0763	0.0511	0.0653	0.1174	0.06	0.0831	0.065	0.0941	0.0431	0.086	0.3642	0.0704	0.0656	0.113	0.1096	0.0999	0.1014	0.2329	0.0997	0.0651	0.0862	0.1044	0.0759	0.3326	0.2024	0.1241	0.0878	0.1151	0.148	0.1098	0.0685	0.0842	0.0795	0.0728	0.0795	0.1066	0.1255
C5OH	0.0498	0.0548	0.0314	0.0449	0.0645	0.0377	0.0503	0.0361	0.0419	0.0372	0.0443	0.0362	0.0371	0.0352	0.082	0.0518	0.0559	0.0394	0.0344	0.0419	0.0379	0.055	0.0677	0.0588	0.052	0.0531	0.0388	0.0438	0.0486	0.1389	0.0488	0.0322	0.0613	0.054	0.045	0.225	0.0432	0.05	0.059	0.0517	0.0347	0.0532	0.0313	0.0482	0.0426	0.0394	0.0366	0.046	0.0643
C5:1DC	0.0402	0.0308	0.0322	0.0266	0.0341	0.0249	0.0237	0.0243	0.0387	0.0201	0.0282	0.0274	0.035	0.0213	0.0218	0.03	0.0291	0.0365	0.0211	0.0236	0.0293	0.0236	0.0277	0.0212	0.0329	0.0312	0.041	0.0266	0.0246	0.0278	0.0261	0.0278	0.0306	0.0311	0.0308	0.0442	0.043	0.0356	0.0254	0.0421	0.035	0.0369	0.037	0.0292	0.0215	0.033	0.0283	0.0392	0.0277
C5DC	0.0558	0.0418	0.0347	0.0316	0.082	0.0347	0.0325	0.0243	0.0459	0.0271	0.0256	0.0378	0.0413	0.0285	0.0209	0.0269	0.0327	0.045	0.0355	0.0387	0.0279	0.0455	0.0688	0.022	0.036	0.0338	0.0518	0.0323	0.0426	0.081	0.0366	0.035	0.0451	0.0283	0.0387	0.1225	0.0506	0.0391	0.0441	0.0406	0.0305	0.0354	0.0353	0.0463	0.0431	0.0321	0.0492	0.0394	0.0386
C8	0.1567	0.2087	0.1554	0.187	0.2317	0.0674	0.1816	0.1066	0.1278	0.1259	0.0535	0.1188	0.0615	0.0658	0.0869	0.1382	0.0696	0.097	0.0578	0.0915	0.0473	0.1323	0.5043	0.0624	0.1051	0.2019	0.1455	0.1283	0.1114	0.2676	0.137	0.0849	0.113	0.1358	0.0632	0.4661	0.1491	0.1358	0.0648	0.1305	0.2715	0.1626	0.1093	0.112	0.1108	0.1536	0.0965	0.0791	0.1251
C5MDC	0.0513	0.0705	0.0383	0.0463	0.0633	0.05	0.0482	0.0338	0.0597	0.0452	0.0513	0.042	0.0479	0.0478	0.0529	0.0348	0.0572	0.0466	0.0557	0.0566	0.0446	0.0591	0.104	0.0417	0.0783	0.0462	0.0514	0.0576	0.0603	0.0977	0.0666	0.0633	0.0585	0.0605	0.0593	0.209	0.0742	0.0453	0.0597	0.0507	0.0692	0.0526	0.0509	0.0467	0.0515	0.038	0.048	0.061	0.0495
C9	0.1073	0.0895	0.0463	0.0476	0.0769	0.0403	0.0709	0.0506	0.0669	0.0577	0.0358	0.0326	0.0435	0.041	0.0441	0.0287	0.0312	0.0479	0.0391	0.0364	0.0387	0.0577	0.0827	0.0423	0.0727	0.0622	0.0642	0.0444	0.0494	0.1259	0.0432	0.0709	0.1272	0.0585	0.0296	0.2925	0.0467	0.0494	0.0497	0.0726	0.0594	0.0488	0.039	0.0692	0.0436	0.058	0.049	0.0688	0.0487
C7DC	0.1111	0.1079	0.1039	0.1711	0.171	0.0849	0.0884	0.0893	0.1125	0.1183	0.0673	0.0937	0.0825	0.1045	0.0833	0.0763	0.0645	0.1434	0.0746	0.0661	0.0694	0.1203	0.1969	0.1276	0.1006	0.0854	0.0867	0.0896	0.0902	0.1208	0.0915	0.5998	0.1076	0.1436	0.0831	0.2344	0.141	0.1012	0.0787	0.4496	0.4837	0.0714	0.1427	0.1033	0.0752	0.1397	0.2793	0.1926	0.1018
C10:2	0.2277	0.2113	0.1694	0.1392	0.245	0.1637	0.1649	0.1909	0.1867	0.1953	0.2116	0.1357	0.1692	0.1591	0.1898	0.1375	0.1733	0.206	0.1758	0.1684	0.1439	0.1905	0.2406	0.1368	0.212	0.2223	0.206	0.1618	0.2405	0.2857	0.2029	0.2061	0.2522	0.1876	0.2001	0.388	0.1681	0.1852	0.1692	0.2179	0.1941	0.1766	0.2119	0.2079	0.1669	0.172	0.2102	0.1938	0.1854
C10:1	0.4169	0.3599	0.3478	0.2928	0.4413	0.2359	0.4099	0.2949	0.3874	0.3213	0.2207	0.2779	0.2723	0.2259	0.2506	0.2716	0.2306	0.272	0.1951	0.3148	0.2178	0.3275	0.6319	0.224	0.263	0.5091	0.3731	0.3126	0.3168	0.4328	0.2343	0.2542	0.2748	0.269	0.2602	0.6921	0.2616	0.4026	0.2054	0.3	0.4834	0.338	0.3492	0.3123	0.3265	0.3744	0.3455	0.2968	0.3545
C10	0.3202	0.406	0.3209	0.385	0.3742	0.1345	0.3645	0.2328	0.2975	0.2988	0.1259	0.2632	0.1567	0.1654	0.1927	0.2429	0.171	0.2041	0.1634	0.1957	0.116	0.2553	0.8399	0.1586	0.1833	0.3371	0.3282	0.2665	0.2498	0.2982	0.2394	0.228	0.1844	0.2112	0.186	0.8998	0.2627	0.2721	0.1789	0.2767	0.5471	0.2783	0.1961	0.2706	0.266	0.3491	0.2199	0.2006	0.2594
C12:1	0.139	0.1418	0.1237	0.198	0.2005	0.0591	0.1404	0.1215	0.1732	0.1697	0.0792	0.187	0.0782	0.0731	0.1156	0.1921	0.0713	0.0707	0.0928	0.0961	0.052	0.1337	0.3406	0.069	0.0887	0.1568	0.2269	0.1359	0.2094	0.1805	0.1564	0.1122	0.0905	0.1212	0.1459	0.7141	0.1438	0.1121	0.0824	0.1161	0.2673	0.1329	0.1725	0.1202	0.117	0.1364	0.1533	0.1327	0.1739
C12	0.1369	0.1332	0.1236	0.1793	0.1427	0.0637	0.1592	0.1158	0.1523	0.1302	0.0619	0.1399	0.077	0.0734	0.1152	0.1684	0.0786	0.1016	0.1045	0.0826	0.0559	0.1001	0.2671	0.0798	0.0701	0.1264	0.1294	0.1257	0.1242	0.1102	0.1199	0.1219	0.1064	0.0896	0.0958	0.5514	0.1125	0.0863	0.1001	0.1066	0.1601	0.1284	0.1713	0.1234	0.1075	0.1098	0.1322	0.1232	0.1064
C14:2	0.054	0.0489	0.0635	0.0596	0.0907	0.0326	0.0887	0.0317	0.0459	0.0501	0.0156	0.0719	0.0241	0.0265	0.0532	0.0635	0.0258	0.0242	0.0286	0.0645	0.0221	0.0538	0.1062	0.0251	0.0317	0.1046	0.0876	0.0438	0.0796	0.0791	0.0594	0.0386	0.0477	0.0466	0.066	0.3389	0.0409	0.0497	0.0317	0.0494	0.0668	0.0336	0.1008	0.0278	0.0453	0.0549	0.0881	0.0403	0.0759
C14:1	0.093	0.1034	0.1153	0.1586	0.1917	0.069	0.1526	0.1057	0.1116	0.1299	0.0372	0.1758	0.0614	0.0714	0.1259	0.1151	0.0584	0.0707	0.0718	0.1076	0.1143	0.1175	0.2337	0.0825	0.0495	0.1071	0.2264	0.1322	0.2272	0.1289	0.1738	0.0875	0.0721	0.114	0.1814	0.5144	0.1486	0.0834	0.0911	0.1278	0.1747	0.1091	0.2236	0.0942	0.082	0.1238	0.1325	0.0976	0.1742
C14	0.0712	0.0726	0.0614	0.073	0.1075	0.0433	0.0594	0.0782	0.0732	0.0719	0.0486	0.0699	0.0604	0.0416	0.0778	0.0852	0.0716	0.057	0.0683	0.0477	0.0416	0.055	0.0957	0.0459	0.0502	0.0507	0.0681	0.0691	0.0682	0.065	0.0548	0.0748	0.0581	0.0539	0.0636	0.1491	0.0626	0.0533	0.0699	0.0603	0.0755	0.0676	0.1182	0.0801	0.0727	0.0632	0.0889	0.0728	0.0695
C12DC	0.1007	0.1038	0.0921	0.0912	0.1389	0.0924	0.0929	0.1078	0.091	0.083	0.0815	0.086	0.089	0.0912	0.0859	0.0991	0.0995	0.1039	0.1017	0.0992	0.0949	0.07	0.0919	0.0877	0.0958	0.108	0.0857	0.1061	0.092	0.1048	0.0835	0.0974	0.0905	0.0811	0.1002	0.145	0.0901	0.0972	0.098	0.0841	0.1126	0.0991	0.0799	0.1212	0.1054	0.0854	0.097	0.1022	0.0744
C14:2OH	0.0305	0.0305	0.0389	0.031	0.0507	0.0281	0.0336	0.0363	0.0272	0.0283	0.0299	0.0268	0.0233	0.0313	0.028	0.0318	0.0303	0.0384	0.0264	0.0267	0.027	0.0321	0.0429	0.0288	0.0256	0.0292	0.0362	0.0308	0.0361	0.0341	0.0316	0.0282	0.049	0.0344	0.0442	0.0979	0.0339	0.0298	0.0338	0.0312	0.0356	0.027	0.0365	0.0329	0.0359	0.0288	0.0366	0.0284	0.0332
C14:1OH	0.0319	0.0375	0.0312	0.0384	0.0603	0.0246	0.0355	0.0313	0.0405	0.0301	0.0275	0.0375	0.0229	0.0296	0.0373	0.0565	0.0303	0.0334	0.0241	0.0428	0.0286	0.0365	0.0626	0.0212	0.0328	0.0328	0.0523	0.0324	0.0498	0.0391	0.0461	0.0386	0.0645	0.0292	0.0431	0.1668	0.0321	0.0315	0.0476	0.0425	0.0395	0.0306	0.0509	0.0366	0.0321	0.0359	0.0385	0.0318	0.0357
C16:2	0.0296	0.0304	0.03	0.0252	0.0556	0.0294	0.0314	0.0236	0.0232	0.0281	0.0216	0.0291	0.0197	0.0272	0.0289	0.0392	0.0213	0.0199	0.0281	0.0343	0.0312	0.0383	0.0343	0.0243	0.0245	0.0298	0.0436	0.0277	0.0322	0.031	0.0333	0.0274	0.0279	0.0245	0.0342	0.0968	0.0304	0.033	0.0269	0.0313	0.0276	0.0235	0.0396	0.0255	0.0318	0.032	0.0338	0.0301	0.0344
C16:1	0.0576	0.0505	0.0697	0.0696	0.1622	0.0475	0.0536	0.0676	0.075	0.0626	0.0391	0.1069	0.0421	0.0452	0.0503	0.1143	0.0584	0.0607	0.067	0.0657	0.0456	0.0704	0.0865	0.0413	0.0566	0.0569	0.1197	0.0582	0.1133	0.0638	0.0761	0.0654	0.0582	0.0674	0.0812	0.2012	0.0749	0.0615	0.0678	0.0994	0.113	0.0558	0.108	0.0554	0.0516	0.054	0.0804	0.0582	0.0792
C16	0.1411	0.1422	0.1857	0.2347	0.4572	0.1381	0.1383	0.2098	0.1799	0.1537	0.11	0.2146	0.1078	0.1328	0.136	0.3761	0.2034	0.21	0.191	0.1386	0.1284	0.1487	0.1643	0.1127	0.1253	0.1847	0.1527	0.1342	0.2097	0.1215	0.1864	0.1583	0.1194	0.129	0.1939	0.484	0.1783	0.152	0.2201	0.1991	0.1819	0.148	0.2071	0.1269	0.1211	0.1459	0.1497	0.1663	0.238
C16:2OH	0.0216	0.0217	0.0207	0.0184	0.033	0.0154	0.0198	0.0165	0.0226	0.0162	0.0183	0.025	0.0197	0.0196	0.0174	0.0318	0.0218	0.0183	0.019	0.0199	0.0188	0.0225	0.0215	0.016	0.0228	0.0217	0.0353	0.0199	0.0215	0.026	0.0201	0.0211	0.0252	0.0244	0.0244	0.0615	0.0186	0.0268	0.016	0.0304	0.0157	0.0154	0.0259	0.0183	0.0153	0.0183	0.0226	0.0199	0.0235
C16:1OH	0.0408	0.0408	0.0312	0.034	0.0558	0.0358	0.0391	0.0458	0.0646	0.041	0.0292	0.0307	0.0455	0.0411	0.0291	0.0585	0.0297	0.0389	0.0356	0.0388	0.0263	0.0485	0.0355	0.0352	0.0361	0.0336	0.0727	0.0357	0.0505	0.0288	0.0519	0.0501	0.117	0.0416	0.0504	0.1413	0.0407	0.0432	0.0398	0.0495	0.0572	0.0371	0.0783	0.0355	0.0344	0.0346	0.0832	0.0407	0.0293
C16OH	0.1189	0.12	0.1231	0.1356	0.1694	0.1133	0.1307	0.1104	0.1153	0.095	0.111	0.1171	0.1153	0.1434	0.1059	0.1242	0.122	0.1261	0.1186	0.1454	0.1385	0.1469	0.104	0.1279	0.1287	0.1303	0.123	0.1423	0.1195	0.1293	0.1005	0.1267	0.1156	0.1218	0.1194	0.1604	0.1339	0.1214	0.1048	0.118	0.1386	0.0931	0.1453	0.1086	0.1123	0.1185	0.1197	0.1007	0.1184
C18:2	0.0603	0.0658	0.1041	0.0889	0.1906	0.0692	0.0842	0.0608	0.0517	0.0433	0.0387	0.0725	0.0577	0.0841	0.0535	0.1169	0.1075	0.1481	0.0555	0.1325	0.0832	0.117	0.0671	0.0664	0.0796	0.1575	0.1593	0.0608	0.1011	0.0631	0.0591	0.0643	0.0572	0.0792	0.0743	0.1254	0.071	0.1361	0.1242	0.1598	0.1322	0.0587	0.1192	0.0758	0.0758	0.07	0.0747	0.0855	0.1663
C18:1	0.12	0.1743	0.2464	0.2298	0.6114	0.1157	0.1393	0.1505	0.1652	0.1346	0.1034	0.2407	0.1148	0.1628	0.1599	0.3123	0.2034	0.2438	0.1809	0.2017	0.0893	0.312	0.2219	0.103	0.2391	0.2244	0.4662	0.2203	0.3549	0.1725	0.247	0.169	0.1815	0.2294	0.218	0.5554	0.2623	0.2634	0.2729	0.4527	0.4707	0.1444	0.3443	0.1809	0.1579	0.2264	0.2453	0.2457	0.3552
C18	0.0393	0.0448	0.0571	0.0916	0.0916	0.0458	0.0419	0.1026	0.0619	0.0345	0.0387	0.0527	0.0581	0.0567	0.0571	0.0897	0.0593	0.0923	0.0615	0.0521	0.0379	0.0471	0.05	0.0329	0.0568	0.0694	0.05	0.0726	0.0798	0.0412	0.0749	0.0594	0.0461	0.0451	0.0519	0.1662	0.0639	0.0519	0.0614	0.0788	0.1069	0.0392	0.0923	0.0571	0.0503	0.0454	0.0507	0.0736	0.0649
C18:1OH	0.0246	0.0257	0.0271	0.0271	0.041	0.0288	0.0264	0.0321	0.0273	0.0233	0.0271	0.0297	0.029	0.0231	0.0233	0.0408	0.0243	0.0243	0.0246	0.0278	0.0256	0.0232	0.0388	0.0288	0.0269	0.0188	0.0388	0.0257	0.0261	0.0305	0.0267	0.0265	0.0313	0.0205	0.0276	0.0787	0.0331	0.0265	0.0274	0.0306	0.0284	0.0231	0.0421	0.0333	0.0257	0.0243	0.0274	0.0304	0.024
[truncated: 6 more columns]
