# Supplementary material for: Harnessing Metabolites as Serum Biomarkers for Liver Graft Pathology Prediction Using Machine Learning
Source: Preprints.org preprint supplement (doi:10.20944/preprints202403.1827.v1), 2024-03-29
Supplement: Supplementary file 2 [file supplementary]

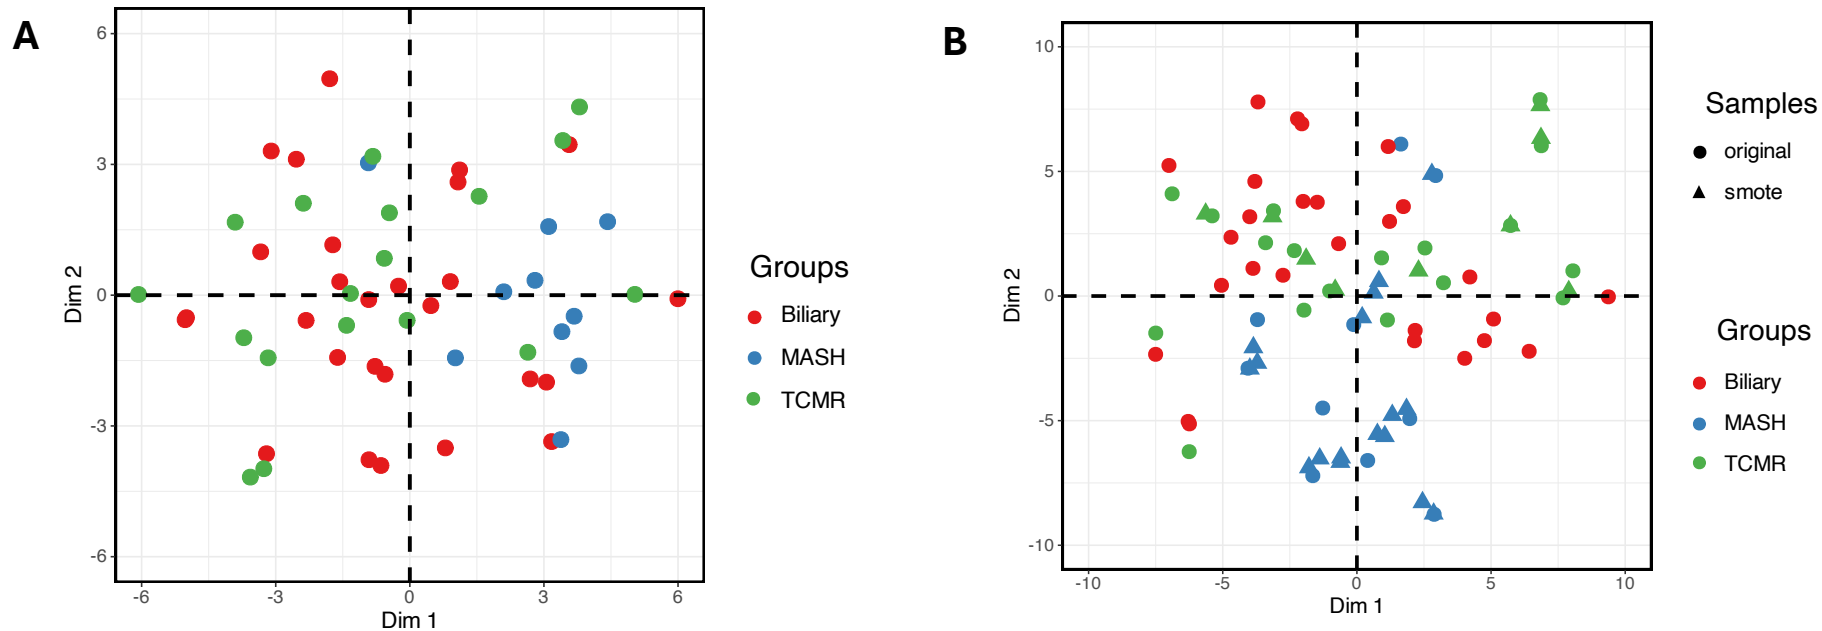

**Figure S1: t-SNE visualization results of samples.** **A.** Projection of the selected metabolites and **B** clinical variables from the original unbalanced dataset. Original samples and those generated using SMOTE. The generated samples closely follow the same distribution as the original dataset.
